# Supplementary material for: Human Systems Biology and Metabolic Modelling: A Review—From Disease Metabolism to Precision Medicine
Source: Biomed Res Int. 2019 Jun 9;2019:8304260. doi: 10.1155/2019/8304260 (PMC6590590; doi:10.1155/2019/8304260)
Supplement: Supplementary Materials — Agreement between theoretical and model-predicted ATP yields for the most recent human metabolic models. We calculate the root mean squared error (RMSE) between the theoretical and model-predicted maximum ATP yields (per unit of carbon source) for the most recent human metabolic models. The RMSE has improved from ∞ (Recon 2 and earlier models) to 5.17 (in Recon 3) and 1.67 (in Recon 2.2). [file 8304260.f1.xlsx]

## Sheet: Sheet1
Carbon source	Recon 2 and earlier: ATP yield	Recon 2.2: ATP yield	Recon 3: ATP yield	Theoretical ATP yield
L-Glutamine - aerobic	ND	ND	22.5	ND
L-Glutamine - anaerobic	ND	ND	1	ND
Fructose - aerobic	ND	ND	32	ND
Fructose - anaerobic	ND	ND	2	ND
Glucose - aerobic	∞	32	32	31
Glucose - anaerobic	∞	2	2	2
Butyrate - aerobic	∞	22	22	21.5
Butyrate - anaerobic	∞	0	0	0
Hexanoate - aerobic	Not present in model	36	34.5	35.25
Hexanoate - anaerobic	Not present in model	0	0	0
Octanoate - aerobic	∞	50	52	49
Octanoate - anaerobic	∞	0	0	0
Decanoate - aerobic	∞	64	67	62.75
Decanoate - anaerobic	∞	0	0	0
Dodecanoate - aerobic	∞	82.5	82	76.5
Dodecanoate - anaerobic	∞	0	0	0
Tetradecanoate - aerobic	∞	92	97	90.25
Tetradecanoate - anaerobic	∞	0	0	0
Hexadecanoate - aerobic	∞	106.75	113	104
Hexadecanoate - anaerobic	∞	0	0	0
Octadecanoate - aerobic	∞	120	129	117.75
Octadecanoate - anaerobic	∞	0	0	0
Arachidate - aerobic	∞	134	143	131.5
Arachidate - anaerobic	∞	0	0	0
Docosanoate - aerobic	∞	147.25	157	145.25
Docosanoate - anaerobic	∞	0	0	0
Lignocerate - aerobic	∞	160.5	168	159
Lignocerate - anaerobic	∞	0	0	0
Hexacosanoate - aerobic	∞	170.75	178.5	172.75
Hexacosanoate - anaerobic	∞	0	0	0
Root mean squared eror	∞	1.67059	5.17622
Data on ATP yields was taken from Recon 2.2 (main text) and Recon 3 (supplementary material)
